# Supplementary material
Source: publisher site journal article supplement (https://www.dovepress.com/article/416565)
Supplement: Supplementary file 1 [file get_supplementary_file.php]

您好！

为了解近期（2022.12.1-2023.1.30）医院新冠感染情况，以便更好地为防控疫情提供科学依据，请您在百忙之中抽空填写该问卷表。该表的内容会保密，不会被他人知晓，希望得到您的支持和配合，不胜感激！填写为自愿性，如填写即认为自愿并知情同意。

Hello!

In order to understand the recent infection of COVID-19 in the hospital (Dec 1,2022—Jan 30, 2023), so as to provide scientific basis for better prevention and control of COVID-19, please take time out of your busy schedule to fill in this questionnaire. The content of this form will be kept confidential and will not be known to others. We hope to receive your support and cooperation. Thank you very much! Filling in is voluntary, and if filled in, it is considered voluntary and informed consent.

1.姓名(Name)

2.科室(Department)

3.性别(Gender)

男(Male) 女(Female)

4.年龄（岁）(Age)

20-29 30-39 40-49 50-59 60-

5.人员类别(Personnel category)

护士(Nurse) 医生(Doctor) 医技(Medical technician) 行政(Administrative personnel) 后勤(Logistics personnel)

6.有无接种过疫苗? (Have you ever been vaccinated with COVID-19 vaccine? )

未接种(Not vaccinated) 接种 1 针(Inoculated 1 dose) 接种 2 针(Inoculated 2 doses) 接种 3 剂(Inoculated 3 doses) 接种 4 剂(Inoculated 4 doses)

7.有无发生新冠?(Did you suffer from COVID-19?)

有(Yes) 无(No)

8 发病日期(Date of onset)

年 月 日 (Year/month/day)

9.临床症状(Clinic manifestation)

发热(Fever) 干咳(Dry cough) 乏力(Fatigue) 嗅觉觉减退(Decreased sense of smell and taste) 鼻塞(Stuffy nose) 流涕( Running nose) 结膜炎(Conjunctivitis)  
肌痛(Myalgia) 腹泻(Diarrhea)

10.实验室检查(Laboratory Examination)

核酸阳性(Positive for nucleic acid) 抗原阳性(Positive for antigen) 核酸阴性(Negative for nucleic acid) 抗原阴性(Negative for antigen) 未检测(No examined)

11.胸部影像学(X光、CT、核磁共振)检查有无炎症? (Does chest imaging (X-ray, CT, MRI) detect inflammation?)

有(Yes) 无(No)
